# Supplementary material for: Effect of the acidic strength on the vapor phase Beckmann rearrangement of cyclohexanone oxime over the MFI zeolite: an embedded ONIOM study
Source: Royal Society of Chemistry journal article supplement (doi:10.1039/b808662a), 2008-11-05
Supplement: b808662a.pdf [file b808662a.pdf]

5

## Supplementary information

10

15

20

25

30

35

40

**Supplementary Table 1** Optimized geometries of 128T ONIOM model of H-[Al]-MFI zeolite (B3LYP/6-31G(d,p):MNDO level of theory) with different models of relaxation. Distances are in Å and angles in degrees.

| Parameters        | Models                            |                                   |                                   |                                    |
|-------------------|-----------------------------------|-----------------------------------|-----------------------------------|------------------------------------|
|                   | 12T/5T<br>(Supplementary Fig. 1c) | 30T/5T<br>(Supplementary Fig. 1d) | 30T/8T<br>(Supplementary Fig. 1e) | 30T/24T<br>(Supplementary Fig. 1f) |
| <b>H-[Al]-MFI</b> |                                   |                                   |                                   |                                    |
| O1-H1             | 0.973                             | 0.970                             | 0.969                             | 0.969                              |
| Si1-O1            | 1.653                             | 1.658                             | 1.682                             | 1.674                              |
| Si2-O2            | 1.582                             | 1.578                             | 1.579                             | 1.591                              |
| Al-O1             | 1.801                             | 1.798                             | 1.804                             | 1.845                              |
| Al-O2             | 1.663                             | 1.668                             | 1.673                             | 1.701                              |
| <Al-O>            | 1.698                             | 1.703                             | 1.709                             | 1.739                              |
| Al-H1             | 2.308                             | 2.389                             | 2.404                             | 2.395                              |
| ∠ Si1-O1-Al       | 133.8                             | 130.7                             | 128.1                             | 128.8                              |
| ∠ Si2-O2-Al       | 130.2                             | 127.0                             | 133.5                             | 141.0                              |
| <b>H-[B]-MFI</b>  |                                   |                                   |                                   |                                    |
| O1-H1             | 0.970                             | 0.969                             | 0.969                             | 0.969                              |
| Si1-O1            | 1.656                             | 1.667                             | 1.687                             | 1.667                              |
| Si2-O2            | 1.607                             | 1.602                             | 1.605                             | 1.603                              |
| B-O1              | 1.782                             | 1.732                             | 1.714                             | 1.745                              |
| B-O2              | 1.402                             | 1.411                             | 1.418                             | 1.412                              |
| <B-O>             | 1.491                             | 1.488                             | 1.487                             | 1.492                              |
| B-H1              | 2.195                             | 2.238                             | 2.223                             | 2.204                              |
| ∠ Si1-O1-B        | 137.6                             | 134.5                             | 135.8                             | 134.9                              |
| ∠ Si2-O2-B        | 149.2                             | 148.1                             | 147.9                             | 150.6                              |

**Supplementary Table 2** Comparison of the adsorption energy,  $\Delta E_{\text{ads}}$  (in kcal/mol) of the N-bond complexes over the H-[Al]-MFI zeolite in the ONIOM2(B3LYP/6-31G(d,p)) and ONIOM2(B3LYP/6-31G(d,p):UFF) schemes.

| Model             | Method                                   | Adsorption energy (kcal/mol) |
|-------------------|------------------------------------------|------------------------------|
| <b>H-[Al]-MFI</b> |                                          |                              |
| 12T:128T          | B3LYP/6-31G(d,p):MNDO                    | -27.73                       |
| 12T:128T          | B3LYP/6-31G(d,p):UFF <sup>a</sup>        | -40.33                       |
| 12T:128T          | MP2/6-311G(d,p):HF/6-31G(d) <sup>a</sup> | -46.25                       |
| 12T:128T          | B3LYP/6-31G(d,p):UFF                     | -43.53                       |
| <b>H-[B]-MFI</b>  |                                          |                              |
| 12T:128T          | B3LYP/6-31G(d,p):MNDO                    | -19.54                       |
| 12T:128T          | B3LYP/6-31G(d,p):UFF <sup>a</sup>        | -35.69                       |
| 12T:128T          | MP2/6-311G(d,p):HF/6-31G(d) <sup>a</sup> | -34.10                       |
| 12T:128T          | B3LYP/6-31G(d,p):UFF                     | -34.79                       |

<sup>a</sup> Single point calculation at the B3LYP/6-31G(d,p):MNDO optimization.

**Supplementary Table 2** Optimized geometries for the Beckmann rearrangement of cyclohexanone oxime on the 128T ONIOM model of H-[Al]-MFI zeolite (B3LYP/6-31G(d,p):MNDO level of theory). Distances are in Å and angles in degrees.

| Parameters       | Adsorption steps of the Beckmann rearrangement on H-[Al]-MFI zeolite |                        |                 |                  |                    |                    |                    |
|------------------|----------------------------------------------------------------------|------------------------|-----------------|------------------|--------------------|--------------------|--------------------|
|                  | N-bound complex                                                      | 1,2 H-shift TS complex | O-bound complex | Rearrangement TS | Enol-amide complex | Tautomerization TS | Keto-amide complex |
| <b>Distances</b> |                                                                      |                        |                 |                  |                    |                    |                    |
| O1-H1            | 1.775                                                                | 0.996                  | 1.984           | 3.089            | 1.754              | 1.513              | -                  |
| N1-H1            | 1.035                                                                | 1.876                  | -               | -                | -                  | -                  | -                  |
| N1-O3            | 1.373                                                                | 1.453                  | 1.535           | 2.545            | 2.261              | -                  | -                  |
| O3-H1            | 2.018                                                                | 1.935                  | 0.989           | 0.966            | 1.002              | 1.045              | 0.985              |
| O3-H2            | 0.986                                                                | 0.976                  | 1.063           | 0.976            | 1.081              | 1.218              | -                  |
| O2-H2            | 1.941                                                                | 1.962                  | 1.435           | 1.994            | 1.398              | 2.240              | 2.015              |
| N-O1             | 2.732                                                                | 2.689                  | -               | -                | -                  | -                  | -                  |
| O2-O3            | 2.794                                                                | 2.763                  | 2.480           | 2.875            | 2.437              | 2.826              | -                  |
| N-C1             | 1.285                                                                | 1.273                  | 1.280           | 1.187            | 1.242              | 1.266              | 1.296              |
| N-C2             | -                                                                    | -                      | 2.338           | 1.995            | 1.465              | 1.462              | 1.474              |
| C1-C2            | 1.488                                                                | 1.504                  | 1.504           | 1.864            | 2.360              | -                  | -                  |
| C1-C3            | 1.497                                                                | 1.502                  | 1.505           | 1.465            | 1.500              | 1.483              | 1.499              |
| N-H2             | -                                                                    | -                      | -               | -                | 2.383              | 1.414              | 1.025              |
| C1-O3            | -                                                                    | -                      | -               | -                | 1.469              | 1.422              | 1.317              |
| <b>Angles</b>    |                                                                      |                        |                 |                  |                    |                    |                    |
| N-H1-O3          | -                                                                    | 44.8                   | -               | -                | -                  | -                  | -                  |
| H1-O3-H2         | -                                                                    | 81.0                   | 103.0           | 103.7            | 97.6               | 107.0              | -                  |
| C2-N-C1          | -                                                                    | -                      | -               | -                | -                  | -                  | -                  |
| C2-N-O3          | -                                                                    | -                      | -               | 151.6            | -                  | -                  | -                  |
| N-C1-O3          | -                                                                    | -                      | -               | -                | 112.8              | 102.3              | 115.6              |
| N-H2-O3          | -                                                                    | -                      | -               | -                | 70.3               | 105.2              | -                  |
| N-C1-O3-H2       | -                                                                    | -                      | -               | -                | 33.9               | 3.8                | -                  |

**Supplementary Table 3** Optimized geometries for the Beckmann rearrangement of cyclohexanone oxime on the 128T ONIOM model of H-[B]-MFI zeolite (B3LYP/6-31G(d,p):MNDO level of theory). Distances are in Å and angles in degrees.

| Parameters       | Adsorption steps of the Beckmann rearrangement on H-[Al]-MFI zeolite |                        |                 |                  |                    |                    |                    |
|------------------|----------------------------------------------------------------------|------------------------|-----------------|------------------|--------------------|--------------------|--------------------|
|                  | N-bound complex                                                      | 1,2 H-shift TS complex | O-bound complex | Rearrangement TS | Enol-amide complex | Tautomerization TS | Keto-amide complex |
| <b>Distances</b> |                                                                      |                        |                 |                  |                    |                    |                    |
| O1-H1            | 1.764                                                                | 0.990                  | 1.042           | 1.960            | 1.022              | 1.466              | -                  |
| N1-H1            | 1.043                                                                | 1.946                  | -               | -                | -                  | -                  | -                  |
| N1-O3            | 1.378                                                                | 1.440                  | 1.465           | 2.522            | 2.526              | -                  | -                  |
| O3-H1            | 2.047                                                                | 1.874                  | 1.510           | 0.980            | 1.562              | 1.062              | 0.973              |
| O3-H2            | 0.983                                                                | 0.975                  | 0.972           | 0.965            | 0.976              | 1.213              | -                  |
| O2-H2            | 2.749                                                                | 2.791                  | 2.414           | -                | 2.523              | 2.488              | 1.764              |
| N-O1             | 2.784                                                                | 2.717                  | -               | -                | -                  | -                  | -                  |
| O2-O3            | 3.218                                                                | 2.953                  | 2.796           | 2.923            | 2.893              | 2.876              | -                  |
| N-C1             | 1.288                                                                | 1.274                  | 1.283           | 1.188            | 1.257              | 1.267              | 1.291              |
| N-C2             | -                                                                    | -                      | 2.361           | 1.999            | 1.460              | 1.461              | 1.474              |
| C1-C2            | 1.484                                                                | 1.498                  | 1.500           | 1.841            | 2.346              | -                  | -                  |
| C1-C3            | 1.501                                                                | 1.505                  | 1.513           | 1.467            | 1.509              | 1.483              | 1.495              |
| N-H2             | -                                                                    | -                      | -               | -                | 2.194              | 1.406              | 1.038              |
| C1-O3            | -                                                                    | -                      | -               | -                | 1.402              | 1.418              | 1.321              |
| <b>Angles</b>    |                                                                      |                        |                 |                  |                    |                    |                    |
| N-H1-O3          | -                                                                    | 44.2                   | -               | -                | -                  | -                  | -                  |
| H1-O3-H2         | -                                                                    | 116.9                  | 107.5           | 105.6            | 105.9              | 107.7              | -                  |
| C2-N-C1          | -                                                                    | -                      | -               | 64.8             | -                  | -                  | -                  |
| C2-N-O3          | -                                                                    | -                      | -               | 149.1            | -                  | -                  | -                  |
| N-C1-O3          | -                                                                    | -                      | -               | -                | 115.9              | 102.2              | 116.1              |
| N-H2-O3          | -                                                                    | -                      | -               | -                | 80.8               | 105.8              | -                  |
| N-C1-O3-H2       | -                                                                    | -                      | -               | -                | 1.6                | 1.4                | -                  |

**Supplementary Table 4** Comparison of the adsorption energy,  $\Delta E_{\text{ads}}$  (in kcal/mol) along the Beckmann rearrangement of cyclohexanone oxime on the H-[Al]-MFI zeolite in the bare cluster, ONIOM and e-ONIOM models.

---

| Geometry/method        | $\Delta E_{\text{ads}}$ |                             |                               |
|------------------------|-------------------------|-----------------------------|-------------------------------|
|                        | 12T model <sup>a</sup>  | ONIOM energies <sup>b</sup> | e-ONIOM energies <sup>c</sup> |
| N-bound complex        | -32.50                  | -46.25                      | -50.67                        |
| 1,2 H-shift TS complex | -19.37                  | -17.88                      | -19.21                        |
| O-bound complex        | -21.02                  | -28.50                      | -31.51                        |
| Rearrangement TS       | 5.25                    | -9.54                       | -15.36                        |
| Enol-amide complex     | -53.09                  | -56.63                      | -59.86                        |
| Tautomerization TS     | -25.14                  | -36.69                      | -40.91                        |
| Keto-amide complex     | -80.64                  | -85.02                      | -90.50                        |

<sup>a</sup>Energies obtained from single point calculations at MP2/6-311G(d,p)//B3LYP/6-31G(d,p) level of theory.

<sup>b</sup>Energies obtained from single point calculations at MP2/6-311G(d,p):HF/6-31G(d)//B3LYP/6-31G(d,p):MNDO level of theory.

<sup>c</sup>Energies obtained from single point calculations at MP2/6-311G(d,p):HF/6-31G(d):electrostatic potentials//B3LYP/6-31G(d,p):MNDO level of theory.

---

**Supplementary Table 5** Comparison of the adsorption energy,  $\Delta E_{\text{ads}}$  (in kcal/mol) along the Beckmann rearrangement of cyclohexanone oxime on the H-[B]-MFI zeolite in the bare cluster, ONIOM and e-ONIOM models.

| Geometry/method        | $\Delta E_{\text{ads}}$ |                             |                               |
|------------------------|-------------------------|-----------------------------|-------------------------------|
|                        | 12T model <sup>a</sup>  | ONIOM energies <sup>b</sup> | e-ONIOM energies <sup>c</sup> |
| N-bound complex        | -18.22                  | -34.10                      | -39.91                        |
| 1,2 H-shift TS complex | -13.62                  | -13.40                      | -15.59                        |
| O-bound complex        | -15.15                  | -17.57                      | -18.91                        |
| Rearrangement TS       | 17.52                   | -4.09                       | -11.45                        |
| Enol-amide complex     | -48.36                  | -50.49                      | -52.19                        |
| Tautomerization TS     | -19.94                  | -26.86                      | -31.77                        |
| Keto-amide complex     | -73.07                  | -77.82                      | -84.65                        |

<sup>a</sup>Energies obtained from single point calculations at MP2/6-311G(d,p)//B3LYP/6-31G(d,p) level of theory.

<sup>b</sup>Energies obtained from single point calculations at MP2/6-311G(d,p):HF/6-31G(d)//B3LYP/6-31G(d,p):MNDO level of theory.

<sup>c</sup>Energies obtained from single point calculations at MP2/6-311G(d,p):HF/6-31G(d):electrostatic potentials//B3LYP/6-31G(d,p):MNDO level of theory

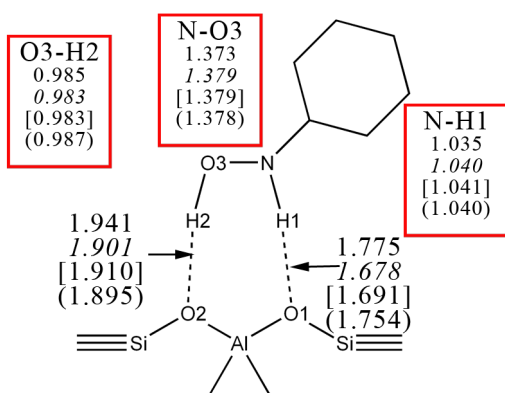

a

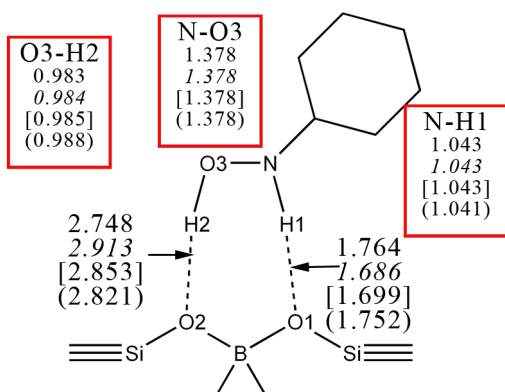

b

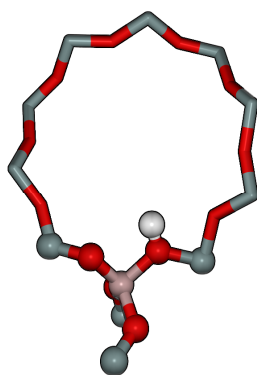

c

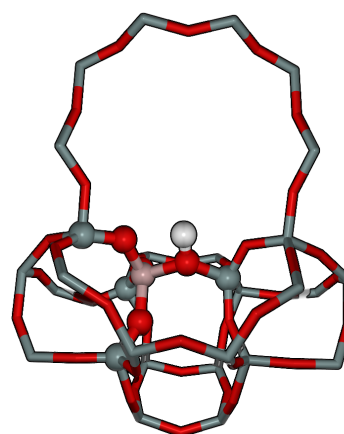

d

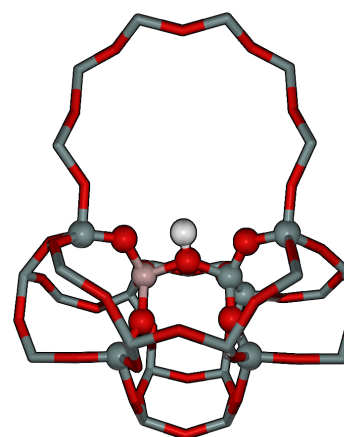

e

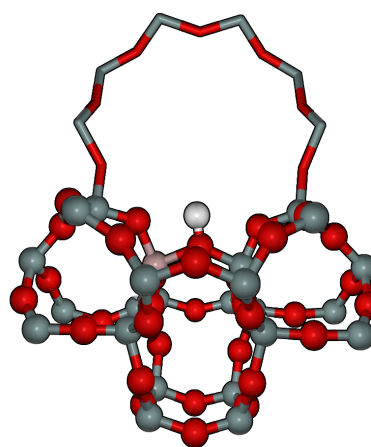

f

10

5

15 **Supplementary Figure 1.** The N-bound complexes at the ONIOM2(B3LYP/6-31G(d,p):MNDO) level of theory: a) H-[Al]-MFI zeolite and b) H-[B]-MFI zeolite (Distances are in Å). The geometrical structures obtained from ONIOM2 scheme with different degree of relaxation in QM region: 5T, 8T and 30T atoms are shown. The nomenclature “nT/mT” is designated in which the “n” refers to number of T atoms in QM region and the “m” refers the degree of relaxation of T atoms in optimization (presented as bonds and sticks): c) 12T/5T, d) 30T/5T, e) [30T/8T] and f) (30T/24T), respectively.

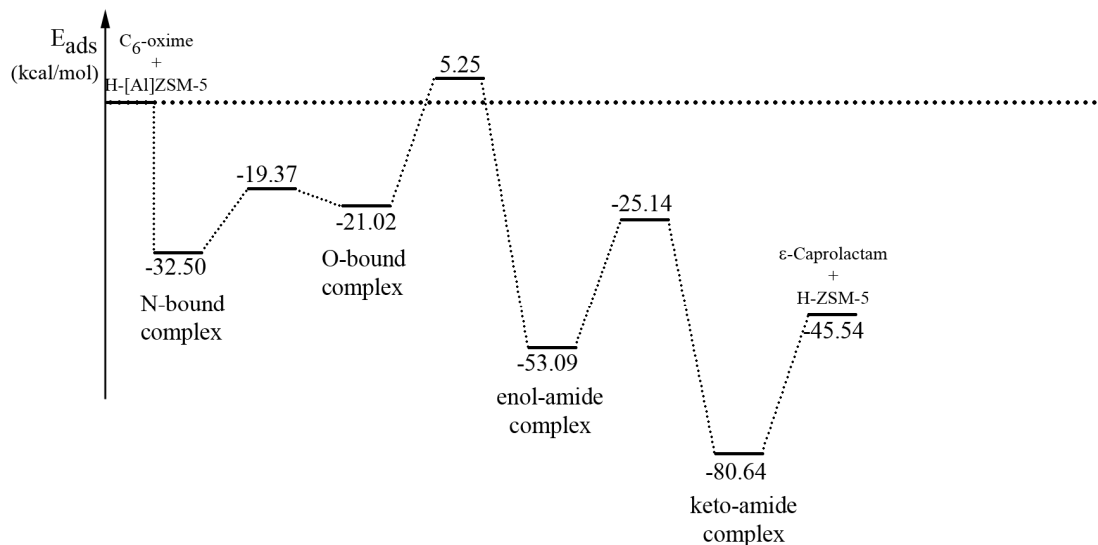

**A**

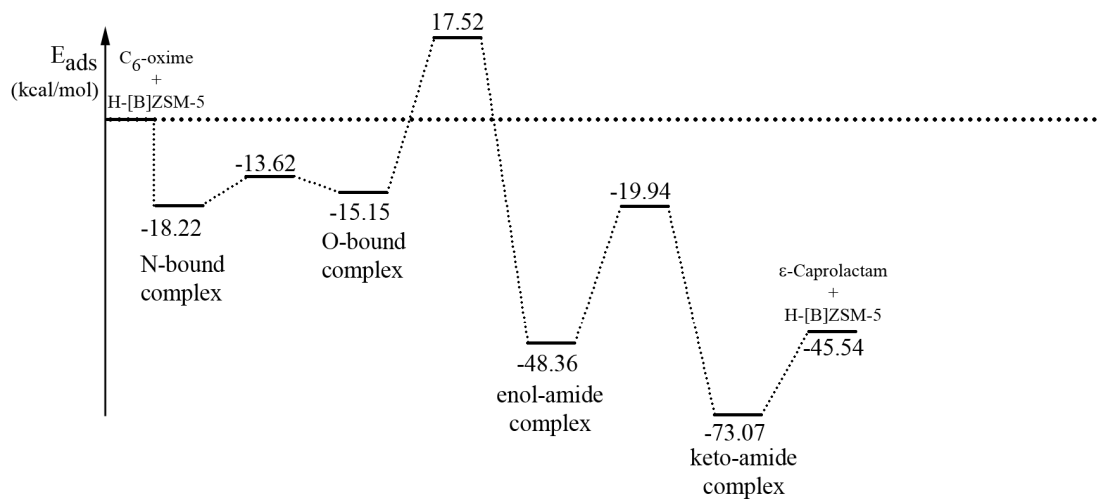

**B**

**Supplementary Figure 2.** Energetic profile along the pathway of the Beckmann rearrangement of cyclohexanone oxime molecules on bare cluster models at the MP2/6-311G(d,p)//B3LYP level of theory: (a) 12T H-[Al]-MFI, (b) 12T H-[B]-MFI. The energetic changes are in kcal/mol
